# Supplementary material
Source: MDPI journal article supplement (https://www.mdpi.com/2079-6412/14/3/350)
Supplement: s1 [file s1]

# Supplementary Materials: Enhanced Biocompatibility and Osteogenic Property of Biodegradable Zn-0.5Li Alloy through Calcium–Phosphorus Coating

Haotian Xing <sup>1,†</sup>, Yunzhi Tang <sup>1,†</sup>, Xinying Fa <sup>1</sup>, Hongyun Zhang <sup>1</sup>, Zhangzhi Shi <sup>1,2</sup>, Shenglian Yao <sup>1,\*</sup> and Luning Wang <sup>1,2,\*</sup>

<sup>1</sup> Beijing Advanced Innovation Center for Materials Genome Engineering, State Key Laboratory for Advance Metals and Materials, School of Materials Science and Engineering, University of Science and Technology Beijing, Beijing 100083, China; u202140489@xs.ustb.edu.cn (H.X.); 18663240210@163.com (Y.T.); faxinying@163.com (X.F.); m20220517@xs.ustb.edu.cn (H.Z.); ryansterne@163.com (Z.S.)

<sup>2</sup> Institute of Materials Intelligent Technology, Liaoning Academy of Materials, Shenyang 110004, China

\* Correspondence: shenglian\_yao@ustb.edu.cn (S.Y.); luning.wang@ustb.edu.cn (L.W.)

† These authors contributed equally to this work.

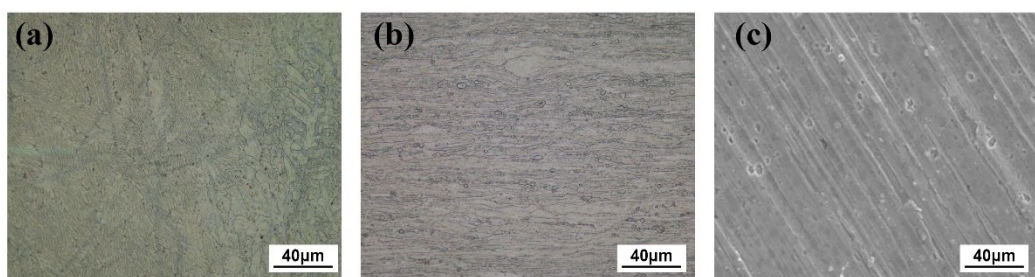

**Scheme S1.** (a) Optical images of cast Zn-0.5Li alloys ( $\times 500$ ), (b) optical images of Zn-0.5Li alloys in the rolled state ( $\times 500$ ), (c) SEM image of the Zn-0.5Li alloy.
